# Supplementary material for: Severe Acute Respiratory Syndrome Coronavirus-2 Inactivation Activity of the Polyphenol-Rich Tea Leaf Extract with Concentrated Theaflavins and Other Virucidal Catechins
Source: MDPI journal article supplement (doi:10.3390/molecules26164803), 2021-08-08
Supplement: s1 [file s1]

# Severe Acute Respiratory Syndrome Coronavirus-2 Inactivation Activity of The Polyphenol-Rich Tea Leaf Extract With Concentrated Theaflavins And Other Virucidal Catechins

Yohei Takeda <sup>1,2</sup>, Kyohei Tamura <sup>2</sup>, Dulamjav Jamsransuren <sup>2</sup>, Sachiko Matsuda <sup>2</sup> and Haruko Ogawa <sup>2,\*</sup>

<sup>1</sup> Research Center for Global Agromedicine, Obihiro University of Agriculture and Veterinary Medicine, 2-11 Inada, Obihiro, Hokkaido, 080-8555, Japan

<sup>2</sup> Department of Veterinary Medicine, Obihiro University of Agriculture and Veterinary Medicine, 2-11 Inada, Obihiro, Hokkaido, 080-8555, Japan

\* Correspondence: author: hogawa@obihiro.ac.jp

Table S1. Composition of 100000 mg of TY-1 powder.

| Component                     |                             | Content                         |
|-------------------------------|-----------------------------|---------------------------------|
| Total polyphenols (~16000 mg) | Total theaflavins (1653 mg) | Theaflavin (TF1)                |
|                               |                             | Theaflavin-3-gallate (TF2A)     |
|                               |                             | Theaflavin-3'-gallate (TF2B)    |
|                               |                             | Theaflavin-3,3'-digallate (TF3) |
|                               | Total catechins (670 mg)    | Epicatechin (EC)                |
|                               |                             | Epicatechin gallate (ECG)       |
|                               |                             | Epigallocatechin (EGC)          |
|                               |                             | Epigallocatechin gallate (EGCG) |
|                               | Gallic acid                 |                                 |
|                               | Other polyphenols           |                                 |
|                               |                             |                                 |
| Caffeine                      |                             |                                 |
| Theanine                      |                             |                                 |
| Dietary fiber                 |                             |                                 |
| Dextrin                       |                             |                                 |

The chemical structures of theaflavins and catechins are shown in the article by Liu *et al.* [18].

## Reference

18. Liu, S.; Lu, H.; Zhao, Q.; He, Y.; Niu, J.; Debnath, A.K.; Wu, S.; Jiang, S. Theaflavin derivatives in black tea and catechin derivatives in green tea inhibit HIV-1 entry by targeting gp41. *Biochim. Biophys. Acta Gen. Subj.* **2005**, *1723*, 270–281, doi:10.1016/j.bbagen.2005.02.012.

## Supplementary Materials and Methods

### *Evaluation of Cytotoxicity of Dextrin and TY-1*

The cytotoxicity of dextrin and TY-1 to VeroE6/TMPRSS2 cells were evaluated using the following two different cell culture procedures.

(1) Dextrin or TY-1 of different concentrations was added to the cell culture medium, VGM. VeroE6/TMPRSS2 cells were cultured in this cell culture medium in 96-well plates (Nalge Nunc International Co., NY, USA) at 37°C for 3 d. The number of live cells was evaluated based on the amount of ATP present in the cells, which was measured using Cell Titer-Glo® Luminescent Cell Viability Assay (Promega Co., WI, USA) and the Glomax® -Multi+ Detection System (Promega Co). The cell viability (%) was calculated using the following formula: [luminescence in the test solution-added well] / [luminescence in the test solution-free well] × 100. Based on the result obtained, the detection limit of the viral titer in the experiment shown in Figure 1 was determined.

(2) Dextrin or TY-1 of different concentrations was added to the cell culture medium, VGM. VeroE6/TMPRSS2 cells were cultured in this cell culture medium in 96-well plates at 37°C for 1 h, after which the cell culture medium was removed. After washing with VGM, new VGM without dextrin or TY-1 was added, and the cells were further incubated at 37°C for 3 d. Then the cell viability was calculated as described above. Based on the results obtained, the concentrations of dextrin and TY-1 used in the experiment shown in Figure 2 were determined.

**Table S2.** Cytotoxicity of dextrin and TY-1.

(Cell culture time in the presence of dextrin or TY-1: 3 d).

| Conc. of dextrin (g/ml). | 0.0   | 31.3 | 62.5 | 125.0 | 250.0 | 500.0 |
|--------------------------|-------|------|------|-------|-------|-------|
| Cell survival (%)        | 100.0 | 98.1 | 89.9 | 99.0  | 101.7 | 103.9 |

| Conc. of TY-1 (g/mL) | 0.0   | 31.3 | 62.5 | 125.0 | 250.0 | 500.0 | 1000.0 |
|----------------------|-------|------|------|-------|-------|-------|--------|
| Cell survival (%)    | 100.0 | 82.6 | 83.6 | 85.8  | 72.8  | 30.5  | 1.1    |

**Table S3.** Cytotoxicity of dextrin and TY-1.

(Cell culture time in the presence of dextrin or TY-1: 1 h)

| Conc. of dextrin (g/mL) | 0.0   | 31.3  | 62.5 | 125.0 |
|-------------------------|-------|-------|------|-------|
| Cell survival (%)       | 100.0 | 103.6 | 99.2 | 97.4  |

  

| Conc. of TY-1 (g/mL) | 0.0   | 50.0  | 100.0 | 200.0 | 400.0 | 800.0 |
|----------------------|-------|-------|-------|-------|-------|-------|
| Cell survival (%)    | 100.0 | 100.2 | 91.5  | 72.9  | 38.1  | 6.5   |
